# Supplementary material
Source: publisher figshare collection journal article supplement (https://acs.figshare.com/ndownloader/files/25421968)
Supplement: Supplementary file 1 [file 25421968]

Supporting Information

# A Biomimetic Approach to Facilitate High Filler Content in Free-Standing and Flexible Thermoelectric Polymer Composite Films Based on PVDF and Ag<sub>2</sub>Se Nanowires

*Hongju Zhou,<sup>a</sup> Zhenjie Zhang,<sup>a</sup> Chengxiao Sun,<sup>a</sup> Hua Deng,<sup>\*a</sup> Qiang Fu<sup>\*a</sup>*

<sup>a</sup> College of Polymer Science and Engineering, State Key Laboratory of Polymer Materials Engineering, Sichuan University, Chengdu 610065, China

\* Corresponding author.

Email: [huadeng@scu.edu.cn](mailto:huadeng@scu.edu.cn) (H. Deng), [qiangfu@scu.edu.cn](mailto:qiangfu@scu.edu.cn) (Q. Fu)

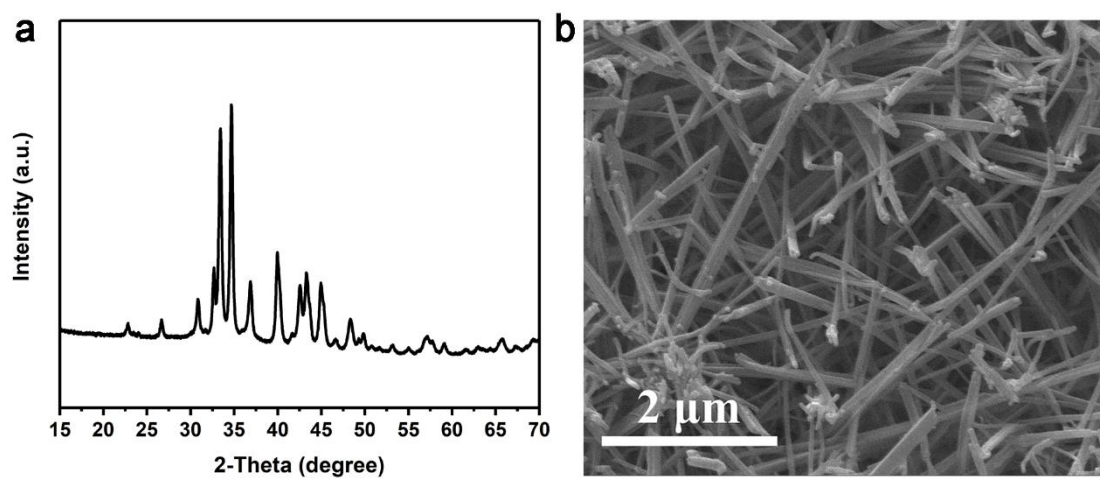

**Figure S1.** XRD pattern and SEM image of  $\text{Ag}_2\text{Se}$  NWs.

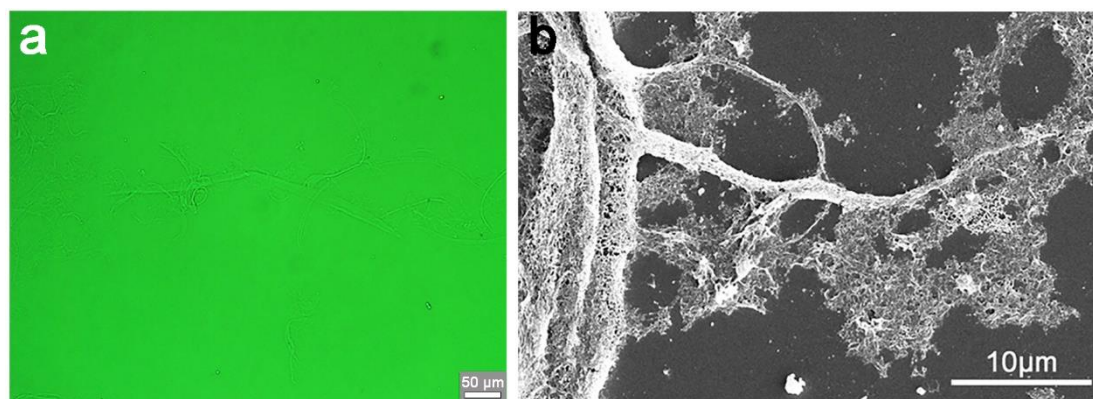

**Figure S2.** Optical microscopy and SEM image of PVDF dendricolloids.

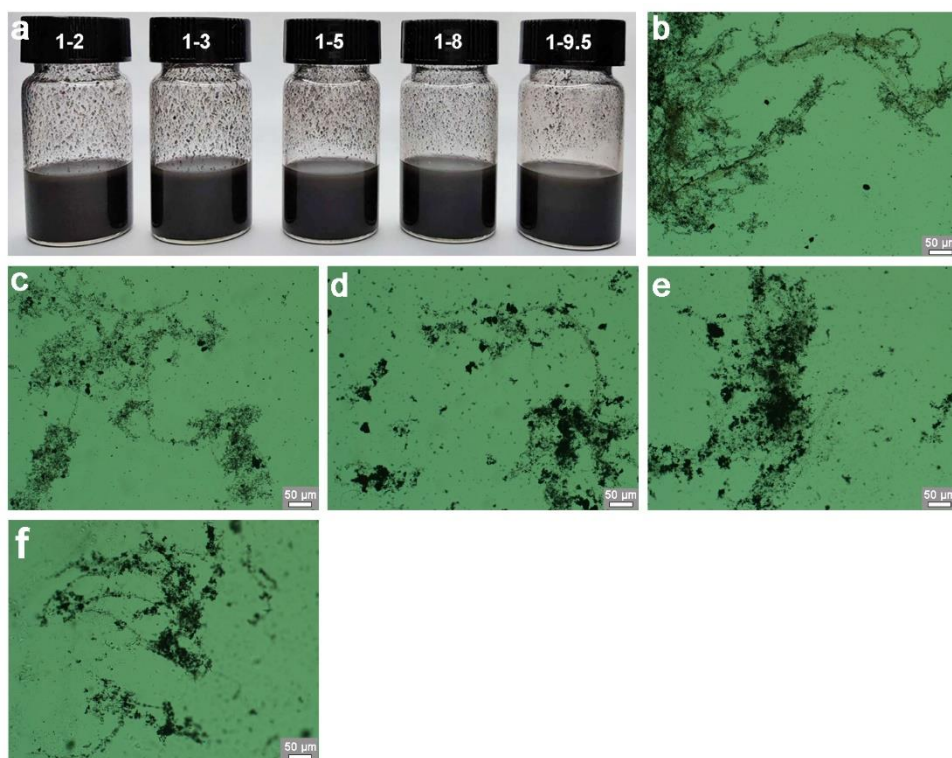

**Figure S3.** Digital photos (a) and optical microscopy of PVDF/Ag<sub>2</sub>Se composite dispersion samples 1-2 (b), 1-3 (c), 1-5 (d), 1-8 (e) and 1-9.5 (f).

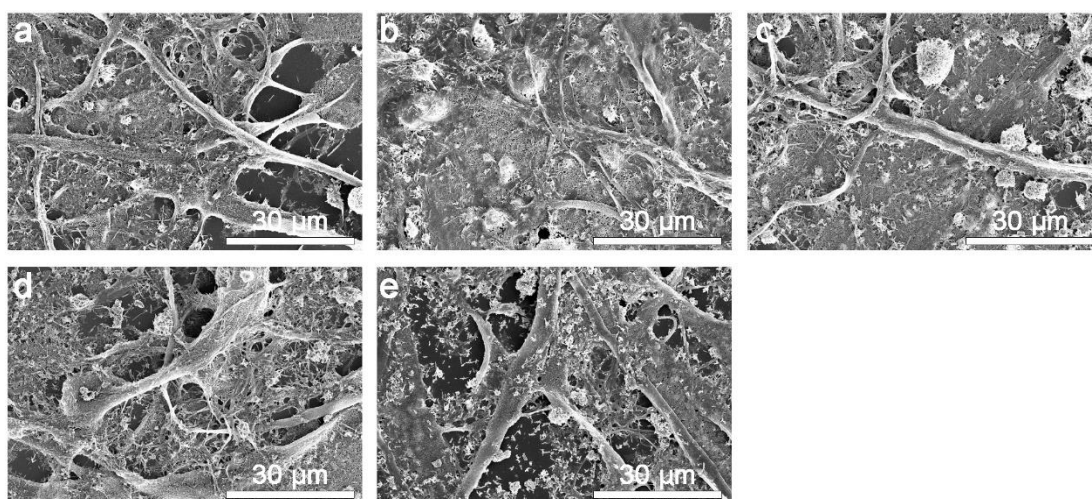

**Figure S4.** SEM images of PVDF/Ag<sub>2</sub>Se composite dispersion samples 1-2 (a), 1-3 (b), 1-5 (c), 1-8 (d), 1-9.5 (e).



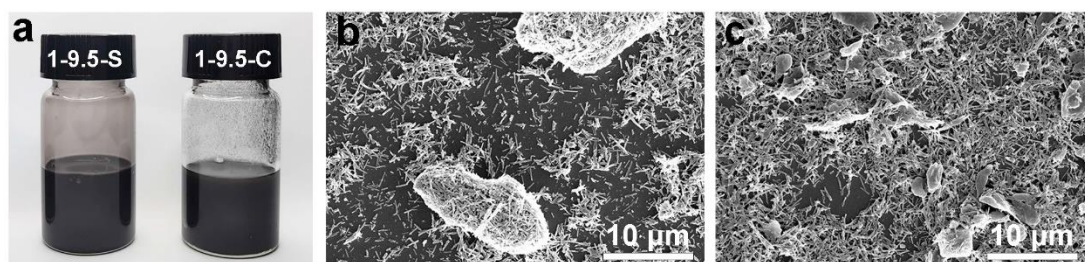

**Figure S5.** Digital photos (a) and SEM images of sample 1-9.5-S (b) and 1-9.5-C (c).

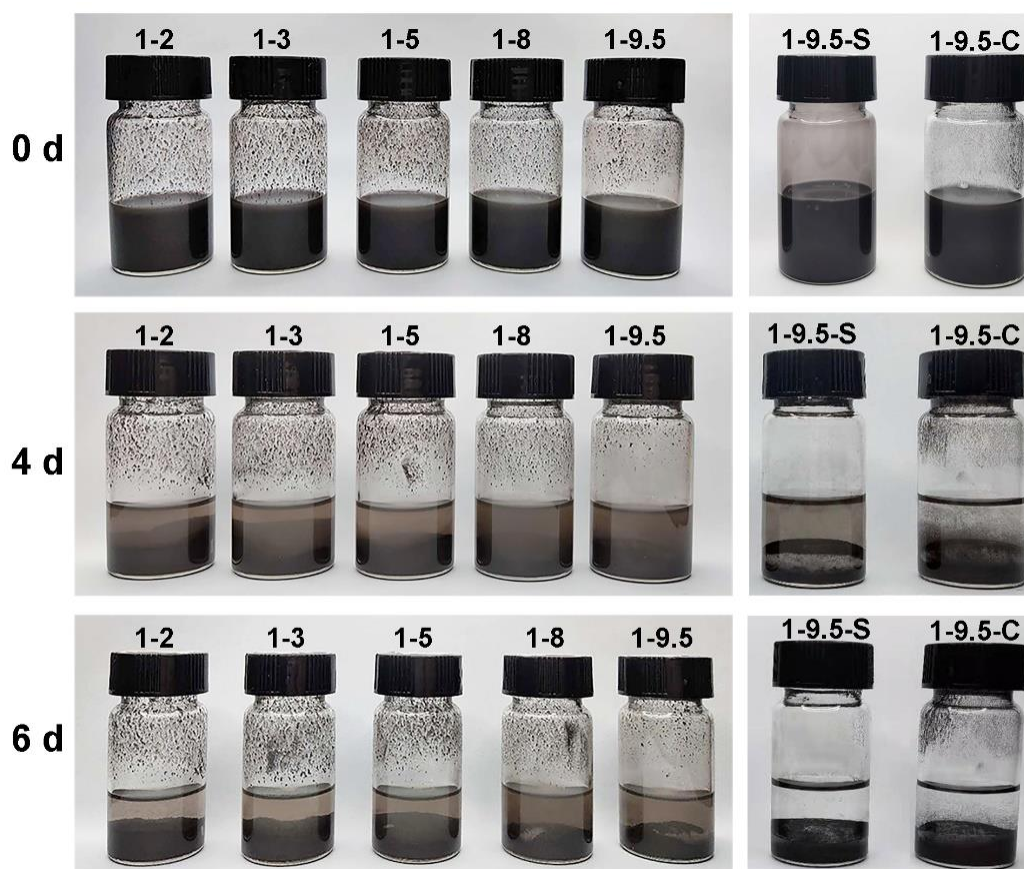

**Figure S6.** Digital photos of the PVDF/Ag<sub>2</sub>Se composite suspension 1-2, 1-3, 1-5, 1-8, 1-9.5, 1-9.5-S and 1-9.5-C (in different columns) originally, after four days and six days, respectively.

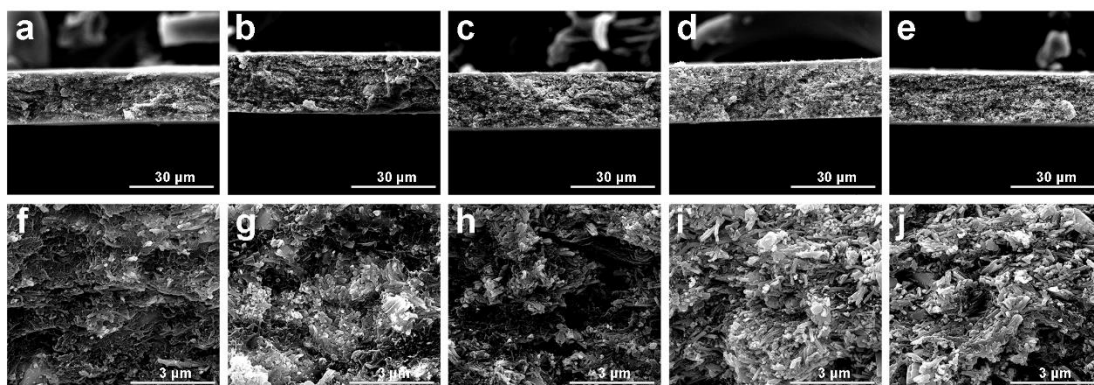

**Figure S7.** Fraction SEM images of PVDF/Ag<sub>2</sub>Se composite films samples 1-2 (a, f), 1-3 (b, g), 1-5 (c, h), 1-8 (d, i) and 1-9.5 (e, j) with different magnification.

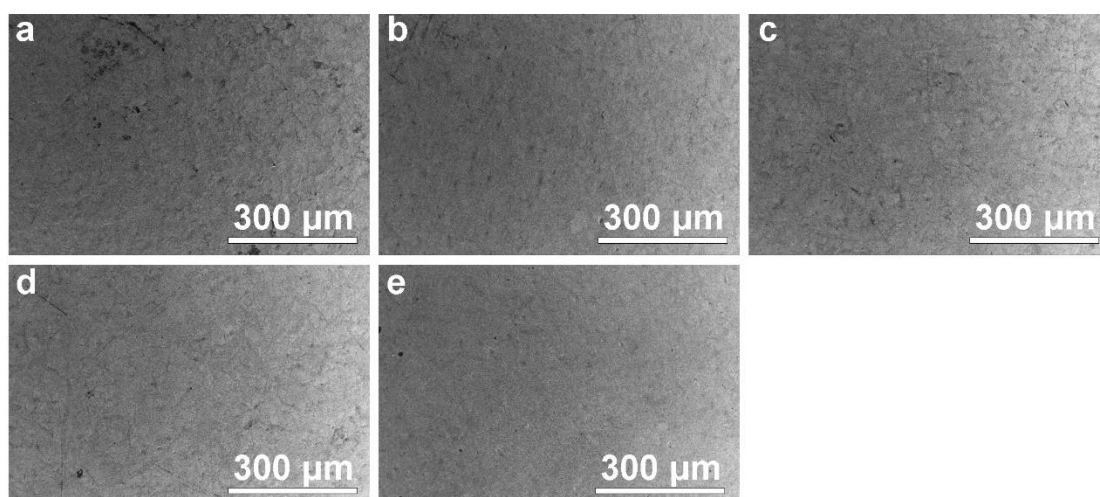

**Figure S8.** SEM images of PVDF/Ag<sub>2</sub>Se composite films surface for sample 1-2 (a), 1-3 (b), 1-5 (c), 1-8 (d) and 1-9.5 (e).

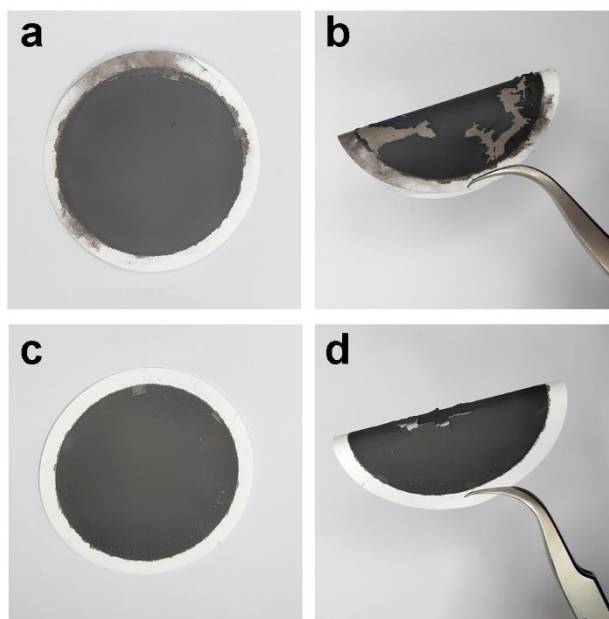

**Figure S9.** Digital photos of PVDF/Ag<sub>2</sub>Se films fabricated from sample 1-9.5-S (a, b) and 1-9.5-C (c, d).

**Table S1.** Specific heat capacity, thermal diffusivity, experimental density and theoretical density of PVDF/Ag<sub>2</sub>Se composite films.

| Sample | Specific heat capacity<br>(J g <sup>-1</sup> K <sup>-1</sup> ) | In-plane thermal diffusivity<br>(mm <sup>2</sup> s <sup>-1</sup> ) | Out-of-Plane thermal diffusivity<br>(mm <sup>2</sup> s <sup>-1</sup> ) | Experimental Density<br>(g cm <sup>-3</sup> ) | Theoretical Density<br>(g cm <sup>-3</sup> ) |
|--------|----------------------------------------------------------------|--------------------------------------------------------------------|------------------------------------------------------------------------|-----------------------------------------------|----------------------------------------------|
| 1-2    | 0.5947                                                         | 3.593±0.141                                                        | 0.0322±0.0112                                                          | 3.27                                          | 3.73                                         |
| 1-3    | 0.4965                                                         | 3.676±0.170                                                        | 0.0334±0.0050                                                          | 3.73                                          | 4.32                                         |
| 1-5    | 0.3983                                                         | 4.343±0.084                                                        | 0.0390±0.0057                                                          | 4.04                                          | 5.13                                         |
| 1-8    | 0.3329                                                         | 4.730±0.103                                                        | 0.0470±0.0057                                                          | 4.47                                          | 5.86                                         |
| 1-9.5  | 0.3142                                                         | 4.719±0.114                                                        | 0.0460±0.0081                                                          | 4.82                                          | 6.13                                         |

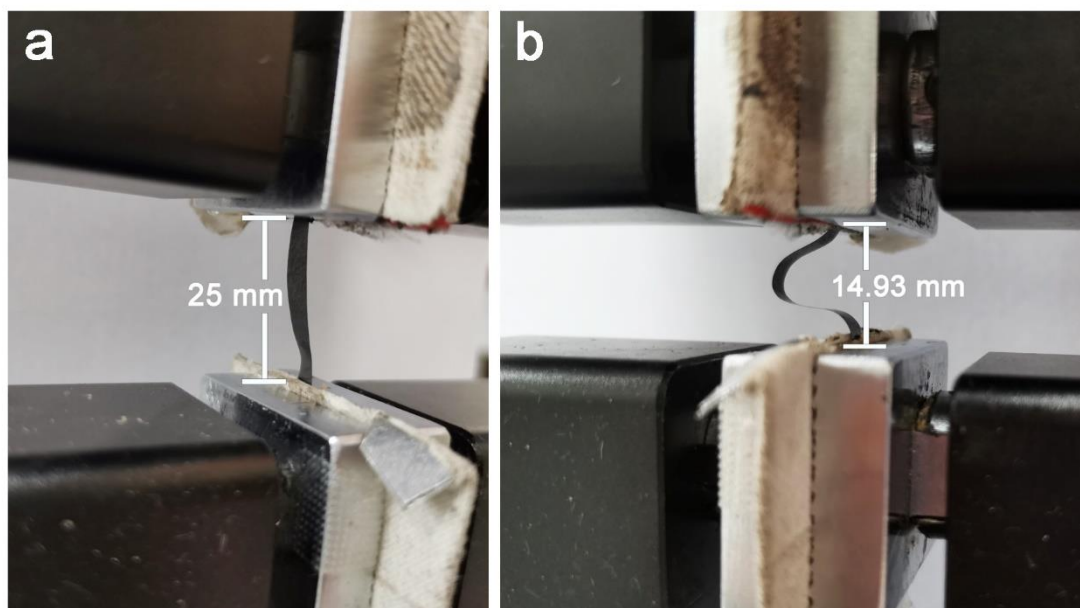

**Figure S10.** Digital photos of a sample 1-9.5 strip (3 mm in width) before (a) and after (b) bending to 40% strain.

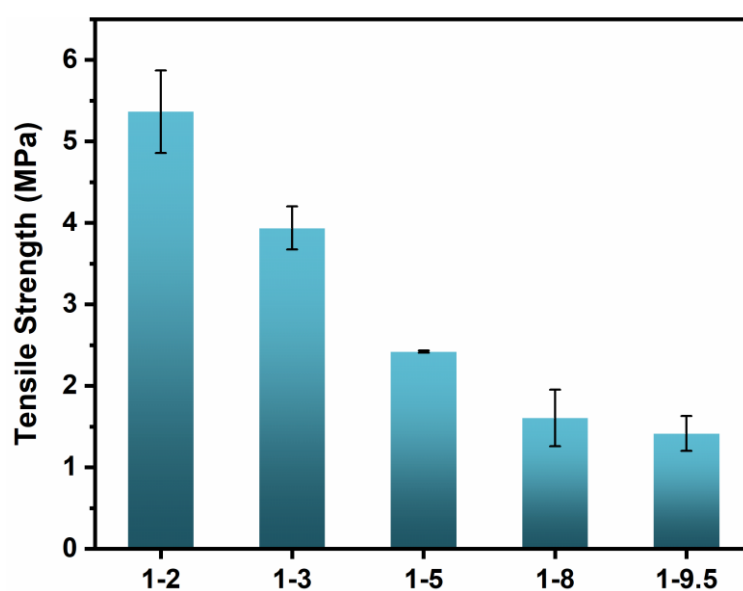

**Figure S11.** Tensile strength of PVDF/Ag<sub>2</sub>Se composite films at room temperature.
